# Supplementary material for: A Preliminary Study of the Impacts of Duckweed Coverage during Rice Growth on Grain Yield and Quality
Source: MDPI journal article supplement (doi:10.3390/plants13010057), 2023-12-23
Supplement: s1 [file s1]

# A Preliminary Study of the Impacts of Duckweed Coverage during Rice Growth on Grain Yield and Quality

Jingsheng Luo <sup>1,2</sup>, Shaowu Hu <sup>3,4</sup>, Tong Li <sup>1,2</sup>, Fuhao He <sup>3,4</sup>, Chao Tian <sup>3,4</sup>, Yu Han <sup>3,4</sup>, Yulin Mao <sup>3,4</sup>, Liquan Jing <sup>3,4</sup>, Lianxin Yang <sup>3,4,\*</sup> and Yunxia Wang <sup>1,2,\*</sup>

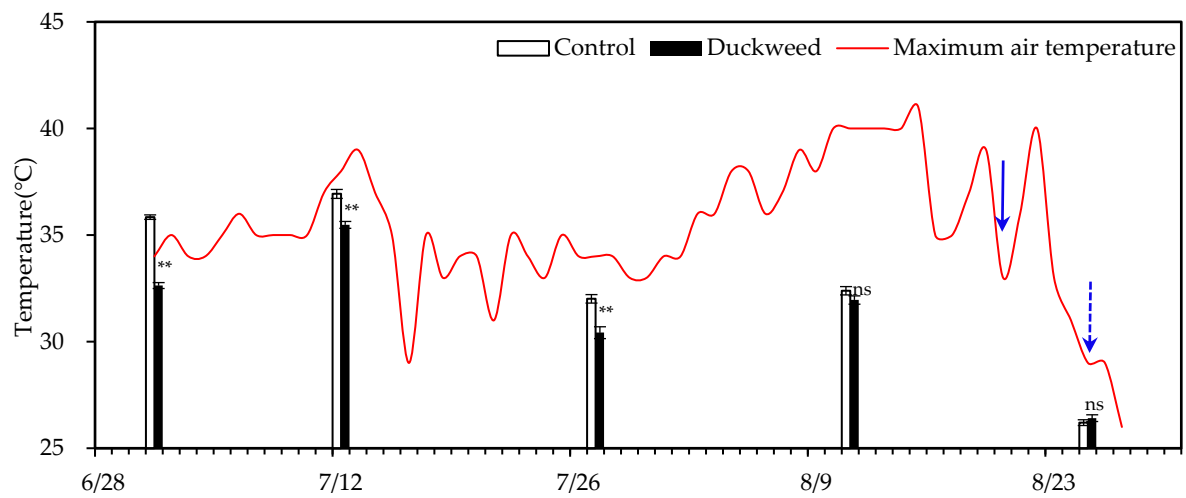

**Fig. S1.** Maximum air temperature and soil temperature at a depth of 5 cm. Data are average values with  $\pm$  standard error (vertical bars). \* $P < 0.05$ , \*\* $P < 0.01$ . Blue solid line with arrow: the heading date of rice under duckweed coverage; Blue broken line with arrow: the heading date of control rice.

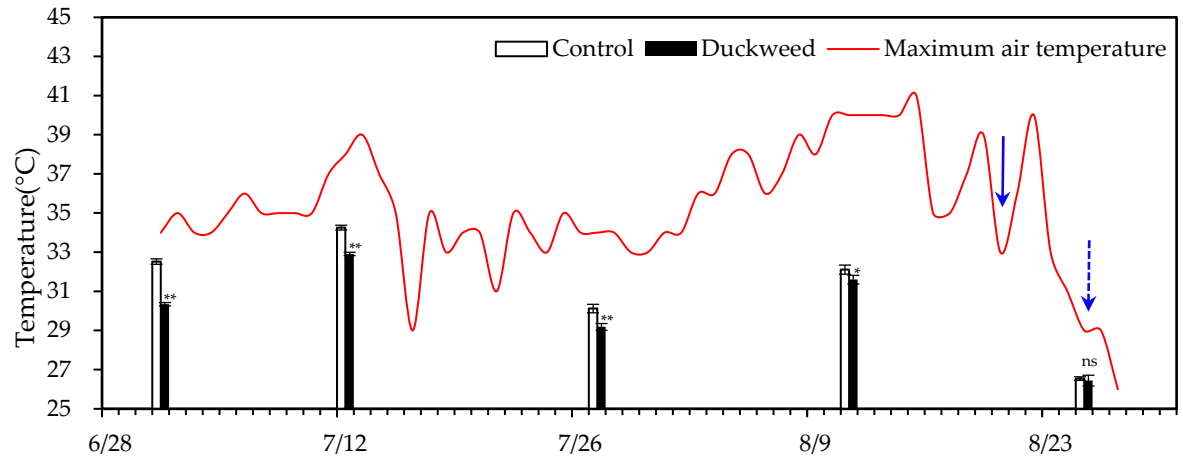

**Fig. S2.** Maximum air temperature and soil temperature at a depth of **10 cm**. Data are average values with  $\pm$  standard error (vertical bars). \* $P<0.05$ , \*\* $P<0.01$ . Blue solid line with arrow: the heading date of rice under duckweed coverage; Blue broken line with arrow: the heading date of control rice

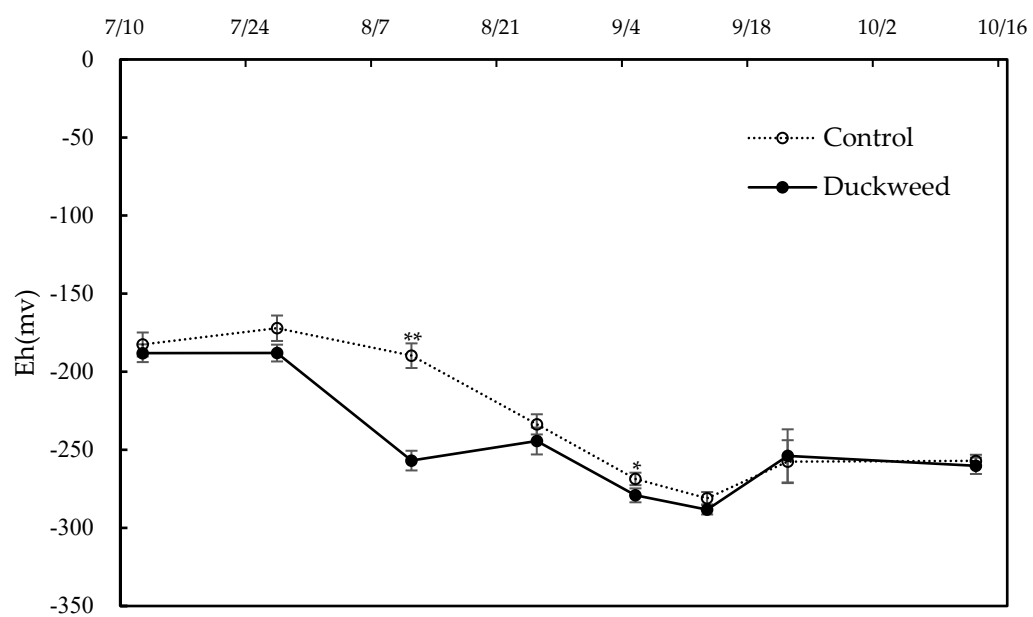

**Fig. S3.** Variation in Eh in soil at a depth of 5 cm. Data are average values with  $\pm$  standard error (vertical bars). \* $P<0.05$ , \*\* $P<0.01$ .

**Table S1.** Effects of duckweed coverage on grain yield and yield components of different experiments.

| Reference number | Treatments                                  | Yield   |    | Panicle density | Spikelet density | Filled grain percentage | Filled grain weight | Duckweed species             | Rice species                  | Test years |
|------------------|---------------------------------------------|---------|----|-----------------|------------------|-------------------------|---------------------|------------------------------|-------------------------------|------------|
| [22]             | 1. Control                                  |         |    |                 |                  |                         |                     |                              |                               |            |
|                  | 2. Urea                                     |         |    |                 |                  |                         |                     |                              |                               |            |
|                  | 3. ENTEC (slow release fertilizer)          | ↑ 8.6%  | ns | (Control )      |                  |                         |                     |                              |                               |            |
|                  | 4. Biogas slurry                            | ↑ 6.3%  | ns | (ENTEC)         |                  |                         |                     |                              |                               |            |
|                  | 5. Control +duckweed                        | ↑ 13.2% | *  | (Urea)          |                  |                         |                     | <i>Lemna minor L.</i>        |                               | 2020       |
|                  | 6. Urea+duckweed                            | ↑ 16.9% | *  | (Biogas slurry) |                  |                         |                     |                              |                               |            |
|                  | 7. ENTEC+duckweed                           |         |    |                 |                  |                         |                     |                              |                               |            |
|                  | 8. Biogas slurry+duckweed                   |         |    |                 |                  |                         |                     |                              |                               |            |
| [26]             | 1. CK                                       |         |    |                 |                  |                         |                     | 1. <i>Landoltia punctata</i> |                               |            |
|                  | 2. <i>Landoltia punctata</i> coverage (LP)  | ↑ 10.8% | ns | (LP)            | ↓ 1.0% ns (LP)   | ↑ 4.2% ns (LP)          | ↑ 12.0% ns (LP)     | ↓ 1.1% ns (LP)               |                               | 2018, 2019 |
|                  | 3. <i>Spirodela polyrhiza</i> coverage (SP) | ↑ 23.7% | *  | (SP)            | ↓ 5.7% ns (SP)   | ↑ 12.3% ns (SP)         | ↑ 11.4% ns (SP)     | ↑ 0.4% ns (SP)               | 2. <i>Spirodela polyrhiza</i> |            |
| [29]             | Soils:                                      |         |    |                 |                  |                         |                     |                              |                               |            |
|                  | 1. Hydragric Anthrosol                      |         |    |                 |                  |                         |                     |                              |                               |            |
|                  | 2. Haplic Acrisol                           |         |    |                 |                  |                         |                     |                              |                               |            |
| [29]             | Treatments:                                 |         |    |                 |                  |                         |                     |                              |                               |            |
|                  | 1. Urea+biochar                             |         |    |                 |                  |                         |                     |                              |                               |            |
|                  | 2. Urea+biochar+duckweed                    |         |    |                 |                  |                         |                     |                              |                               |            |
| [20]             |                                             |         |    |                 |                  |                         |                     |                              |                               |            |
|                  |                                             |         |    |                 |                  |                         |                     |                              |                               |            |
|                  |                                             |         |    |                 |                  |                         |                     |                              |                               |            |
|                  |                                             |         |    |                 |                  |                         |                     |                              |                               |            |
|                  |                                             |         |    |                 |                  |                         |                     |                              |                               |            |
|                  |                                             |         |    |                 |                  |                         |                     |                              |                               |            |
|                  |                                             |         |    |                 |                  |                         |                     |                              |                               |            |
|                  |                                             |         |    |                 |                  |                         |                     |                              |                               |            |
| [19]             |                                             |         |    |                 |                  |                         |                     |                              |                               |            |
|                  |                                             |         |    |                 |                  |                         |                     |                              |                               |            |
|                  |                                             |         |    |                 |                  |                         |                     |                              |                               |            |
|                  |                                             |         |    |                 |                  |                         |                     |                              |                               |            |
|                  |                                             |         |    |                 |                  |                         |                     |                              |                               |            |
|                  |                                             |         |    |                 |                  |                         |                     |                              |                               |            |
|                  |                                             |         |    |                 |                  |                         |                     |                              |                               |            |
|                  |                                             |         |    |                 |                  |                         |                     |                              |                               |            |
| [14]^            | 1. 0 kg N/ha                                |         |    |                 |                  |                         |                     |                              |                               |            |
|                  | 2. 90 kg N/ha                               |         |    |                 |                  |                         |                     |                              |                               |            |
|                  | 3. 180 kg N/ha                              |         |    |                 |                  |                         |                     |                              |                               |            |
|                  | 4. 0 kg N/ha+duckweed                       |         |    |                 |                  |                         |                     |                              |                               |            |
| [14]^            | 5. 90 kg N/ha+duckweed                      |         |    |                 |                  |                         |                     |                              |                               |            |
|                  | 6. 180 kg N/ha+duckweed                     |         |    |                 |                  |                         |                     |                              |                               |            |
|                  |                                             |         |    |                 |                  |                         |                     |                              |                               |            |
|                  |                                             |         |    |                 |                  |                         |                     |                              |                               |            |
| [14]^            | 1. 0% duckweed coverage                     |         |    |                 |                  |                         |                     |                              |                               |            |
|                  | 2. 25% duckweed coverage                    |         |    |                 |                  |                         |                     |                              |                               |            |
|                  | 3. 75% duckweed coverage                    |         |    |                 |                  |                         |                     |                              |                               |            |
|                  | 4. 100% duckweed coverage                   |         |    |                 |                  |                         |                     |                              |                               |            |
| [27]             | 1. No fertilizer                            |         |    |                 |                  |                         |                     |                              |                               |            |
|                  | 2. Fertilizer                               |         |    |                 |                  |                         |                     |                              |                               |            |
|                  | 3. No fertilizer+Azolla pinnata             |         |    |                 |                  |                         |                     |                              |                               |            |
|                  | 4. Fertilizer+Azolla pinnata                |         |    |                 |                  |                         |                     |                              |                               |            |
| [28]             | 1. 0 kg N/ha                                |         |    |                 |                  |                         |                     |                              |                               |            |
|                  | 2. 0 kg N/ha+Azolla                         |         |    |                 |                  |                         |                     |                              |                               |            |
|                  | 3. 330 kg N/ha                              |         |    |                 |                  |                         |                     |                              |                               |            |
|                  | 4. 330 kg N/ha+Azolla                       |         |    |                 |                  |                         |                     |                              |                               |            |
|                  | 5. 280.5 kg N/ha                            |         |    |                 |                  |                         |                     |                              |                               |            |
|                  | 6. 280.5 kg N/ha+Azolla                     |         |    |                 |                  |                         |                     |                              |                               |            |
|                  | 7. 231 kg N/ha                              |         |    |                 |                  |                         |                     |                              |                               |            |
|                  | 8. 231 kg N/ha+Azolla                       |         |    |                 |                  |                         |                     |                              |                               |            |

Duckweed coverage increased(↑) , decreased(↓) , or had no significant effect(ns) on yield and yield components. \* $P < 0.05$ . CK: Control. A, no statistic analysis was provided in this paper.

**Table S2.** Effects of duckweed coverage on element contents of shoots in rice seedlings of different rice cultivars.

| Cultivars         | Treatments | N<br>(mg g <sup>-1</sup> ) | P<br>(mg g <sup>-1</sup> ) | K<br>(mg g <sup>-1</sup> ) | Ca<br>(mg g <sup>-1</sup> ) | Mg<br>(mg g <sup>-1</sup> ) | Fe<br>(mg kg <sup>-1</sup> ) | Mn<br>(mg kg <sup>-1</sup> ) | Cu<br>(mg kg <sup>-1</sup> ) | Zn<br>(mg kg <sup>-1</sup> ) |
|-------------------|------------|----------------------------|----------------------------|----------------------------|-----------------------------|-----------------------------|------------------------------|------------------------------|------------------------------|------------------------------|
| JXY1              | Control    | 33.72±0.72                 | 4.95±0.54                  | 23.63±0.20                 | 5.84±1.79                   | 2.84±0.29                   | 315.95±103.41                | 444.81±13.24                 | 2.14±0.26                    | 11.59±0.52                   |
|                   | Duckweed   | 23.88±1.42                 | 4.90±0.34                  | 20.31±2.32                 | 2.64±0.12                   | 1.99±0.16                   | 293.49±84.84                 | 200.82±34.50                 | 1.59±0.23                    | 8.13±0.41                    |
| NJ9108            | Control    | 32.64±1.09                 | 4.72±0.21                  | 25.11±1.92                 | 3.59±0.43                   | 2.18±0.05                   | 390.00±41.02                 | 435.83±75.01                 | 1.70±0.05                    | 14.14±0.46                   |
|                   | Duckweed   | 29.77±1.15                 | 4.64±0.09                  | 22.19±0.25                 | 2.48±0.16                   | 1.79±0.10                   | 303.35±26.88                 | 262.74±50.50                 | 1.46±0.14                    | 10.52±0.88                   |
| YNX28             | Control    | 36.54±2.83                 | 3.66±0.19                  | 21.86±0.37                 | 4.11±0.20                   | 2.72±0.16                   | 209.91±36.35                 | 347.22±19.04                 | 2.18±0.10                    | 12.61±0.95                   |
|                   | Duckweed   | 30.77±1.42                 | 4.61±0.18                  | 20.22±0.95                 | 3.90±0.43                   | 2.09±0.15                   | 278.46±102.37                | 246.02±22.98                 | 1.65±0.06                    | 10.08±0.55                   |
| All               | Control    | 34.30±1.07                 | 4.44±0.27                  | 23.53±0.74                 | 4.51±0.63                   | 2.58±0.14                   | 305.28±42.71                 | 409.29±27.50                 | 2.01±0.11                    | 12.78±0.50                   |
|                   | Duckweed   | 28.14±1.26                 | 4.72±0.12                  | 20.91±0.79                 | 3.01±0.26                   | 1.96±0.08                   | 291.77±39.32                 | 236.53±21.01                 | 1.57±0.08                    | 9.58±0.49                    |
| ANOVA result      |            |                            |                            |                            |                             |                             |                              |                              |                              |                              |
| Duckweed          |            | <0.001                     | 0.273                      | 0.030                      | 0.036                       | 0.001                       | 0.825                        | <0.001                       | 0.006                        | <0.001                       |
| Cultivar          |            | <0.001                     | 0.055                      | 0.170                      | 0.301                       | 0.041                       | 0.399                        | 0.473                        | 0.119                        | 0.010                        |
| Duckweed×Cultivar |            | 0.127                      | 0.183                      | 0.801                      | 0.188                       | 0.413                       | 0.581                        | 0.270                        | 0.564                        | 0.680                        |

Values are means ± standard errors.
